# Supplementary material for: Environmental Benefits of Ultra-Low Emission (ULE) Technology Applied in China
Source: MDPI journal article supplement (doi:10.3390/atmos12121693), 2021-12-17
Supplement: s1 [file s1]

# Environmental Benefits of Ultra-Low Emission (ULE) Technology Applied in China

Xiaomiao Jiao <sup>1,2,3</sup>, Ruijing Ni <sup>2</sup>, Lulu Chen <sup>2</sup>, Jamiu Adetayo Adeniran<sup>2,4</sup> Hongjian Weng <sup>2</sup>, Jingxu Wang <sup>5</sup>, Youfan Chen <sup>2,6</sup>, Shihua Ren <sup>1, \*</sup> and Xiao Liu <sup>3, \*</sup>

- <sup>1</sup> Technology Support Center, China Coal Research Institute, Beijing 100013, China; jiaoxm@pku.edu.cn  
<sup>2</sup> Laboratory for Climate and Ocean-Atmosphere Studies, Department of Atmospheric and Oceanic Sciences, School of Physics, Peking University, Beijing 100871, China; nirj@pku.edu.cn (R.N.); luluchen@pku.edu.cn (L.C.); adeniranja@pku.edu.cn (J.A.); wenghj@pku.edu.cn (H.W.); wangjingxu@ouc.edu.cn (J.W.); cyfan@pku.edu.cn (Y.C.)  
<sup>3</sup> National Institute of Clean-and-Low-Carbon Energy (NICE), Beijing 102211, China  
<sup>4</sup> Department of Chemical Engineering, Faculty of Engineering and Technology, University of Ilorin, 240003, Nigeria  
<sup>5</sup> Key Laboratory of Physical Oceanography, College of Oceanic and Atmospheric Sciences, Ocean University of China, Qingdao 266100, China  
<sup>6</sup> Sichuan Academy of Environmental Policy and Planning, Chengdu 610041, China  
\* Correspondence: ren@cct.org.cn (S.R.); liuxiao.u@chnenergy.com.cn (X.L.)

**Table S1.** Definition of Coal-fired Sectors <sup>a</sup>.

| Integrated Sectors | Detailed Sectors                                                                              |
|--------------------|-----------------------------------------------------------------------------------------------|
| Power              | Thermal Power; Heating Supply                                                                 |
| Industry           | Coal Washing; Coking; Petroleum Refineries; Gas Works; Briquettes; Industry Final Consumption |

a. Coal-fired sectors are classified based on China Energy Statistical Yearbook 2016: [http://www.stats.gov.cn/tjsj/tjcbw/201706/t20170621\\_1505833.html](http://www.stats.gov.cn/tjsj/tjcbw/201706/t20170621_1505833.html).

**Table S2.** The Sectors Definition of the GAINS <sup>b</sup>.

| Sectors & Fuel type        | Coal  | Liquid fuels | Natural gas | Biomass | Agriculture | Industrial processes & production | Other sources incl. natural | Non-exhaust |
|----------------------------|-------|--------------|-------------|---------|-------------|-----------------------------------|-----------------------------|-------------|
| Power & heating plants     | 188.8 | 2.9          | 0.45        | 0.78    | 0           |                                   |                             | 188.78      |
| Fuel conversion            | 1.4   | 0.2          | 0.17        |         |             |                                   |                             | 1.39        |
| Residential combustion     | 4.2   | 1.2          | 1.85        | 32.83   | 0           |                                   |                             | 4.2         |
| Industrial combustion      | 159.4 | 2.4          | 4.77        | 1.08    |             |                                   | 66.11                       | 159.42      |
| Industrial processes       |       |              |             |         |             | 121.55                            | 5.09                        |             |
| Light duty vehicles        |       | 21.12        |             |         |             |                                   |                             |             |
| Heavy duty vehicles-diesel |       | 181.56       | 0.26        |         |             |                                   |                             |             |
| Non-road machinery         |       | 172.67       |             |         |             |                                   |                             |             |
| Agriculture                |       |              |             |         |             |                                   |                             | 1.7         |

|       |       |        |      |       |   |        |       |        |
|-------|-------|--------|------|-------|---|--------|-------|--------|
| Waste |       |        |      |       |   |        | 0.12  |        |
| Sum   | 353.8 | 381.98 | 7.51 | 34.69 | 0 | 121.55 | 73.02 | 353.79 |

---

b Take the NO<sub>x</sub> emission results from Anhui province in the GAINS inventory as an example.  
GAINS: <http://www.iiasa.ac.at/webhome/research/researchPrograms/air/Asia.html>.
